# Supplementary material for: Enzymatically Catalyzed Molecular Aggregation
Source: Research Square preprint supplement (doi:10.21203/rs.3.rs-4194082/v1), 2024-04-26
Supplement: Supplementary file 1 [file c7b3f3e9dd8bf14e871565a9.docx]

Supplementary information

**Enzymatically Catalyzed Molecular Aggregation**

Wen-Jin Wang1,2, Rongyuan Zhang1, Liping Zhang1, Liang Hao1, Xu-Min Cai3,Qian Wu4, Zijie Qiu1, Ruijuan Han1, Jing Feng1, Shaojuan Wang1*, Parvej Alam1, Guoqing Zhang2, Zheng Zhao1* and Ben Zhong Tang1,4*

1 Clinical Translational Research Center of Aggregation-Induced Emission, The Second Affiliated Hospital School of Medicine, School of Science and Engineering Shenzhen Institute of Aggregate Science and Technology, The Chinese University of Hong Kong, Shenzhen (CUHK-Shenzhen), Guangdong 518172, China

2 University of Science and Technology of China, Hefei, Anhui 230026, China

3 Jiangsu Co-Innovation Center of Efficient Processing and Utilization of Forest Resources International Innovation Center for Forest Chemicals and Materials College of Chemical Engineering Nanjing Forestry University

4 Department of Chemistry, Hong Kong Branch of Chinese National Engineering Research Center for Tissue Restoration and Reconstruction, Institute of Molecular Functional Materials, Division of Life Science and State Key Laboratory of Molecular Neuroscience, The Hong Kong University of Science and Technology, Clear Water Bay, Kowloon, Hong Kong, China

* Corresponding authors. Email: [609199354@qq.com](mailto:609199354@qq.com) (S. W.), [zhaozheng@cuhk.edu.cn](mailto:zhaozheng@cuhk.edu.cn) (Z. Z), [tangbenz@cuhk.edu.cn](mailto:tangbenz@cuhk.edu.cn) (B. Z. T)

**Table of contents**

[**Experimental Section** 2](#_Toc159502412)

[General 2](#_Toc159502413)

[Materials 2](#_Toc159502414)

[General instruments 3](#_Toc159502415)

[**Synthesis and characterization** 3](#_Toc159502416)

[Scheme S1 4](#_Toc159502417)

[Synthesis of **3** 4](#_Toc159502418)

[Synthesis of TB*m*A (4a) and TB*p*A (4b) 5](#_Toc159502419)

[Synthesis of **5a** and **5b** 6](#_Toc159502420)

[Synthesis of TB*m*A-Glu (6a) andTB*p*A-Glu (6b) 6](#_Toc159502421)

[**Supporting Scheme, Figures, and Tables** 8](#_Toc159502422)

[Fig. S1 8](#_Toc159502423)

[Fig. S2 8](#_Toc159502424)

[Fig. S3 9](#_Toc159502425)

[Fig. S4 9](#_Toc159502426)

[Fig. S5 10](#_Toc159502427)

[Fig. S6 10](#_Toc159502428)

[Fig. S7 11](#_Toc159502429)

[Fig. S8 11](#_Toc159502430)

[Fig. S9 12](#_Toc159502431)

[Fig. S10 12](#_Toc159502432)

[Fig. S11 13](#_Toc159502433)

[Fig. S12 13](#_Toc159502434)

[Fig. S13 14](#_Toc159502435)

[Fig. S14 14](#_Toc159502436)

[Fig. S15 15](#_Toc159502437)

[Fig. S16 15](#_Toc159502438)

[Fig. S17 16](#_Toc159502439)

[Fig. S18 16](#_Toc159502440)

[Fig. S19 17](#_Toc159502441)

[Fig. S20 17](#_Toc159502442)

[Fig. S21 17](#_Toc159502443)

[Fig. S22. 18](#_Toc159502444)

[Fig. S23 18](#_Toc159502445)

[Fig. S24 19](#_Toc159502446)

[Fig. S25 20](#_Toc159502447)

[Fig. S26 21](#_Toc159502448)

[Fig. S27 21](#_Toc159502449)

[Fig. S28 22](#_Toc159502450)

[Fig. S29 23](#_Toc159502451)

[Fig. S30 24](#_Toc159502452)

[Fig. S31 25](#_Toc159502453)

[Fig. S32 26](#_Toc159502454)

[Fig. S33 27](#_Toc159502455)

[Fig. S34 27](#_Toc159502456)

[Fig. S35 28](#_Toc159502457)

[Fig. S36 28](#_Toc159502458)

[Fig. S37 29](#_Toc159502459)

[Fig. S38 30](#_Toc159502460)

[Fig. S39 31](#_Toc159502461)

[Fig. S40 31](#_Toc159502462)

[Fig. S41 32](#_Toc159502463)

[Fig. S42 32](#_Toc159502464)

[Table S1 33](#_Toc159502465)

[Table S2. 34](#_Toc159502466)

[**References** 35](#_Toc159502467)

# Experimental Section

# General

Materials**:** 4, 7-dibromo-2,1, 3-benzothiadiazole, N-(4-(4,4,5,5-Tetramethyl-1,3,2-dioxaborolan-2-yl)phenyl-N-phenylbenzenamine were purchased from Energy Chemical, China. Tetratriphenylphosphine palladium, 2-(7-Azabenzotriazol-1-yl)-N,N,N',N'-tetramethyluronium hexafluorophosphate (HATU) were purchased from Adamas-beta (China). N,N-Diisopropylethylamine, 3-aminobenylboric acid, and 4-aminobenylboric acid were obtained from Didepharm (China). Dimethyl sulfoxide (DMSO), 2′,7′-Dichlorodihydrofluorescein diacetate (H2DCF-DA), Hydroxyphenyl fluorescein (HPF), 9,10-Anthracenediyl-bis(methylene)dimalonic Acid (ABDA), Glutamyltransferase (G9270) and 3-(4,5-dimethyl-2-thiazolyl)-2,5-diphenyl-2-H-tetrazolium bromide (MTT) were purchased from Sigma−Aldrich. Dulbecco's modified eagle medium (DMEM, Giobic®), Roswell Park Memorial Institute medium (RPMI1640 Medium, Giobic®), fetal bovine serum (FBS, Giobic®), trypsin (Giobic®), Phosphate-Buffered Saline (PBS, Giobic®), penicillin-streptomycin solution (Giobic®) were brought from ThermoFisher Scientific. The antibodies for GGT (ab109427), GPX4 (ab125066), and β-actin (ab8226) were obtained from Abcam. All the other reagents were obtained through commercial resources. All the tested compounds were dissolved in DMSO as stock solution and diluted into the expected experiment concentration containing 1% (v/v) DMSO as needed.

General instruments**:** ESI-MS was carried out on a Thermo Scientific LTQ linear ion trap mass spectrometer. 1H NMR and 13C NMR were recorded by a Bruker AVANCE III 500 MHz spectrometer (Germany). Chemical shifts were referenced relative to the internal solvent signals. Fluorescence measurements were conducted on an FLS1000 system (Edinburgh Instruments) and Horiba PL spectrometer (Fluorolog-3). High-resolution mass spectra (HRMS) were collected on a Bruker maXis ultra-high resolution (UHR)-TOF mass spectrometer in electrospray ionization (ESI)-positive mode. Cell viability was measured using a Molecular Devices FlexStation 3 microplate reader (USA). Cell imaging assays were performed on a Leica TCS SP8 STED 3X confocal laser scanning fluorescence microscopy and Leica DMi8 inversion microscope (Germany). Flow cytometry was conducted on a BD FACS Calibur (USA).

# Synthesis and characterization

Scheme S1**.** The synthetic route for TB*m*A-Glu and TB*p*A-Glu.

4-(7-bromobenzo[c][1,2,5]thiadiazol-4-yl)-N,N-diphenylaniline (3): Compound **3** was synthesized according to the reported method1 with minor modification: 4, 7-dibromo-2,1, 3-benzothiadiazole (**1**, 587.9 mg, 2.0 mmol), N-(4-(4,4,5,5-Tetramethyl-1,3,2-dioxaborolan-2-yl)phenyl-N-phenylbenzenamine (**2**, 891.1 mg, 2.4 mmol) were added to 100 mL round-bottomed flask along with potassium carbonate (829.3 mg, 6 mmol) and tetratriphenylphosphine palladium (69.3 mg, 0.06 mmol) in 40 mL of 1, 4-dioxane. The mixture was refluxed under N2 for 12 h. After the reaction was finished, the catalyst was removed by filtration, and the solvent was removed under reduced pressure. The concentrated liquid was dissolved in methylene chloride (CH2Cl2) and washed using a brine solution (NaCl). The organic layer was dried using anhydrous sodium sulfate, concentrated, and finally purified by column chromatography (PE: EA=5:1) to obtain orange-red powder **3** with a yield of 73.2%. The structure of **3** was characterized and confirmed through 1H NMR and HR-ESI-MS, which are coordinated with the reported data.

**4-(7-(3-aminophenyl)benzo[c][1,2,5]thiadiazol-4-yl)-N,N-diphenylaniline (TB*m*A, 4a):** The product **2** (475.0 mg, 1 mmol) and 3-aminobenylboric acid (178.0 mg, 1.3 mmol) were added into a 50 mL round-bottomed flask, respectively. Potassium carbonate (414.7 mg, 3 mmol) and tetratriphenylphosphine palladium (34.7 mg, 0.03 mmol) were dissolved in 20 mL of 1, 4-dioxane. Reflux reaction under argon protection overnight. After the reaction, the catalyst was removed by filtration, and the solvent was removed under reduced pressure. The concentrated liquid was dissolved in methylene chloride (CH2Cl2) and washed using a brine solution (NaCl). The organic layer was dried using anhydrous sodium sulfate, concentrated, and finally purified by column chromatography (PE: EA=3:1) to obtain a red powderof TB*m*A with a yield of 56%.

1H NMR (500 MHz, CDCl3) δ (ppm): 7.87 (d, *J* = 8.2 Hz, 2H), 7.74 (s, 2H), 7.38 – 7.26 (m, 8H), 7.20 (t, *J* = 9.3 Hz, 7H), 7.07 (t, *J* = 7.4 Hz, 2H), 6.83 (d, *J* = 6.8 Hz, 1H).13C NMR (125 MHz, CDCl3) δ (ppm) 154.36, 148.38, 147.80, 138.96, 133.12, 131.24, 130.27, 129.90, 129.70, 128.54, 127.61, 125.25, 123.65, 123.22, 120.45, 116.59. HR-ESI-MS (CH3OH) *m/z*: calculated for [M+H]+ (C30H23N4S+) 471.1643, found 471.1638.

4-(7-(4-aminophenyl)benzo[c][1,2,5]thiadiazol-4-yl)-N,N-diphenylaniline (TB*p*A, 4b)**:** TB*p*A was prepared via the similar synthetic method as TB*m*A with 4-aminobenylboric acid instead of 3-aminobenylboric acid. TB*p*A was obtained as a red powderwith a yield of 65.4%.

1H NMR (500 MHz, DMSO-*d6*) *δ* (ppm): 7.94 (d, *J* = 8.3 Hz, 2H), 7.82 (dd, *J* = 22.7, 8.2 Hz, 4H), 7.35 (t, *J* = 7.8 Hz, 4H), 7.10 (d, *J* = 7.8 Hz, 8H), 6.72 (d, *J* = 8.2 Hz, 2H), 5.45 (s, 2H). 13C NMR (125 MHz, DMSO-*d6*) δ (ppm): 153.63, 153.58, 149.32, 147.18, 147.03, 132.45, 130.97, 130.05, 129.97, 129.74, 127.81, 125.92, 124.43, 123.50, 122.62, 113.77. HR-ESI-MS (CH3OH) *m/z*: calculated for [M+H]+ (C30H23N4S+) 471.1643, found 471.1664.

# Tert-butyl N2-(tert-butoxycarbonyl)-N5-(3-(7-(4-(diphenylamino)phenyl)benzo[c][1,2,5]thiadiazol-4-yl)phenyl)-L-glutaminate (5a) and tert-butyl N2-(tert-butoxycarbonyl)-N5-(4-(7-(4-(diphenylamino)phenyl)benzo[c][1,2,5]thiadiazol-4-yl)phenyl)-L-glutaminate (5b): TBmA or TBpA (235.3 mg, 0.5 mmol), Boc-L-glutamate-1-tert-butyl ester (227.5 mg, 0.75 mmol) were added to 50 mL round-bottled flask, respectively. HATU (384.2 mg, 1 mmol) and DIPEA (193.9 mg, 1.5 mmol) were dissolved in 10 mL tetrahydrofuran and reacted overnight at room temperature. After the reaction, it was washed with saturated salt water, extracted using methylene chloride, dried using anhydrous sodium sulfate, and purified by column chromatography (PE: EA=1:1) to obtain target products.

**5a:**orange powder (yield 92.3%). 1H NMR (500 MHz, DMSO-*d6*) *δ* (ppm):10.07 (s, 1H), 8.24 (s, 1H), 7.98 (d, *J* = 8.3 Hz, 2H), 7.94 (d, *J* = 7.4 Hz, 1H), 7.88 (d, *J* = 7.4 Hz, 1H), 7.67 (dd, *J* = 16.8, 7.9 Hz, 2H), 7.47 (t, *J* = 7.9 Hz, 1H), 7.37 (t, *J* = 7.7 Hz, 4H), 7.15 – 7.05 (m, 8H), 3.87 (q, *J* = 8.0 Hz, 1H), 2.49 – 2.41 (m, 3H), 2.05 – 1.97 (m, 1H), 1.83 (dd, *J* = 14.5, 8.1 Hz, 1H), 1.41 (s, 18H).13C NMR (125 MHz, DMSO-*d6*) *δ* (ppm):171.62, 170.51, 155.53, 153.39, 153.34, 147.48, 146.87, 139.44, 137.33, 131.85, 131.63, 130.38, 130.17, 129.67, 128.86, 128.38, 127.39, 124.49, 123.84, 123.55, 122.29, 119.68, 118.91, 80.33, 78.06, 53.88, 32.69, 28.18, 27.66, 26.19. HR-ESI-MS (CH3OH) *m/z*: calculated for [M+H]+ (C44H46N5O5S+) 756.3241, found 756.3234.

**5b:**red powder (yield 90.6%). 1H NMR (500 MHz, DMSO-*d6*) *δ* (ppm): 10.11 (s, 1H), 7.98 (dd, *J* = 15.1, 8.3 Hz, 4H), 7.91 (s, 2H), 7.77 (d, *J* = 8.3 Hz, 2H), 7.36 (t, *J* = 7.8 Hz, 4H), 7.20 (d, *J* = 7.9 Hz, 1H), 7.12 (d, *J* = 7.8 Hz, 7H), 3.87 (q, *J* = 7.8 Hz, 1H), 2.46 (t, *J* = 7.7 Hz, 3H), 2.06 – 2.02 (m, 1H), 1.83 (dd, *J* = 14.6, 8.1 Hz, 1H), 1.42 (s, 18H). 13C NMR (125 MHz, DMSO-*d6*) *δ* (ppm): 171.62, 170.52, 155.54, 153.40, 147.38, 146.88, 139.36, 131.35, 131.24, 130.50, 130.10, 129.67, 129.40, 127.66, 127.46, 124.46, 123.52, 122.33, 118.89, 80.34, 78.07, 53.88, 32.73, 28.20, 27.94, 27.67, 26.17. HR-ESI-MS (CH3OH) *m/z*: calculated for [M+Na]+ (C44H46N5O5S+) 778.3034, found 778.3057.

N5-(3-(7-(4-(diphenylamino)phenyl)benzo[c][1,2,5]thiadiazol-4-yl)phenyl)-L-glutamine (TB*m*A-Glu, 6a) and N5-(4-(7-(4-(diphenylamino)phenyl)benzo[c][1,2,5]thiadiazol-4-yl)phenyl)-L-glutamine (TB*p*A-Glu, 6b)**:** The (270 mg, 0.2 mmol) obtained in the previous step was added to a 25 mL round-bottomed flask, and a mixture of 5 mL trifluoroacetic acid/water/triisopropyl silane was added drop by drop under ice bath cooling (*V*TFA/*V*H2O/*V*TIS=95:2.5:2.5). The reaction was heated to room temperature for 10 min and continued for 5 h. After the reaction, the solvent was removed under reduced pressure, and the solid obtained was recrystallized with ethyl acetate to obtain glutamic acid-modified AIE-PS,

TB*m*A-Glu: red powder (yield 98.4%). 1H NMR (500 MHz, DMSO-*d6*) *δ* (ppm): 10.55 (s, 1H), 8.26 (s, 1H), 7.93 (dd, *J* = 20.0, 7.9 Hz, 5H), 7.85 (d, *J* = 7.5 Hz, 1H), 7.73 (d, *J* = 8.1 Hz, 1H), 7.64 (d, *J* = 7.8 Hz, 1H), 7.45 (t, *J* = 8.0 Hz, 1H), 7.36 (t, *J* = 7.8 Hz, 4H), 7.14 – 7.07 (m, 8H), 2.59 (d, *J* = 8.1 Hz, 2H), 2.15 – 2.04 (m, 2H), 2.02 (s, 1H).13C NMR (125 MHz, DMSO-*d6*) *δ* (ppm): 153.41, 147.49, 146.88, 139.53, 137.33, 131.85, 131.67, 130.39, 130.19, 129.71, 128.83, 128.40, 127.40, 124.51, 123.59, 122.29, 119.75, 119.02, 59.78, 53.39, 32.81, 14.11. HR-ESI-MS (CH3OH) *m/z*: calculated for [M+H]+ (C35H30N5O3S+) 600.2064, found 600.2089.

TB*p*A-Glu: red powder (yield 98.2%). 1H NMR (500 MHz, DMSO-*d6*) *δ* (ppm): 10.41 (s, 1H), 7.97 (dd, *J* = 12.9, 6.7 Hz, 4H), 7.88 (s, 2H), 7.78 (d, *J* = 6.5 Hz, 2H ), 7.36 (t, *J* = 6.3 Hz, 4H), 7.11 (dd, *J* = 6.7, 3.7 Hz, 8H), 3.67 – 3.58 (m, 1H), 2.63 – 2.55 (m, 2H), 2.06 (m, 2H). 13C NMR (125 MHz, DMSO) δ 170.33, 153.29, 146.77, 130.01, 129.58, 129.31, 127.58, 127.34, 124.36, 123.45, 122.21, 118.89, 59.64, 20.66, 13.98. HR-ESI-MS (CH3OH) *m/z*: calculated for [M+H]+ (C35H30N5O3S+) 600.2064, found 600.2072.

# Supporting Scheme, Figures, and Tables

**
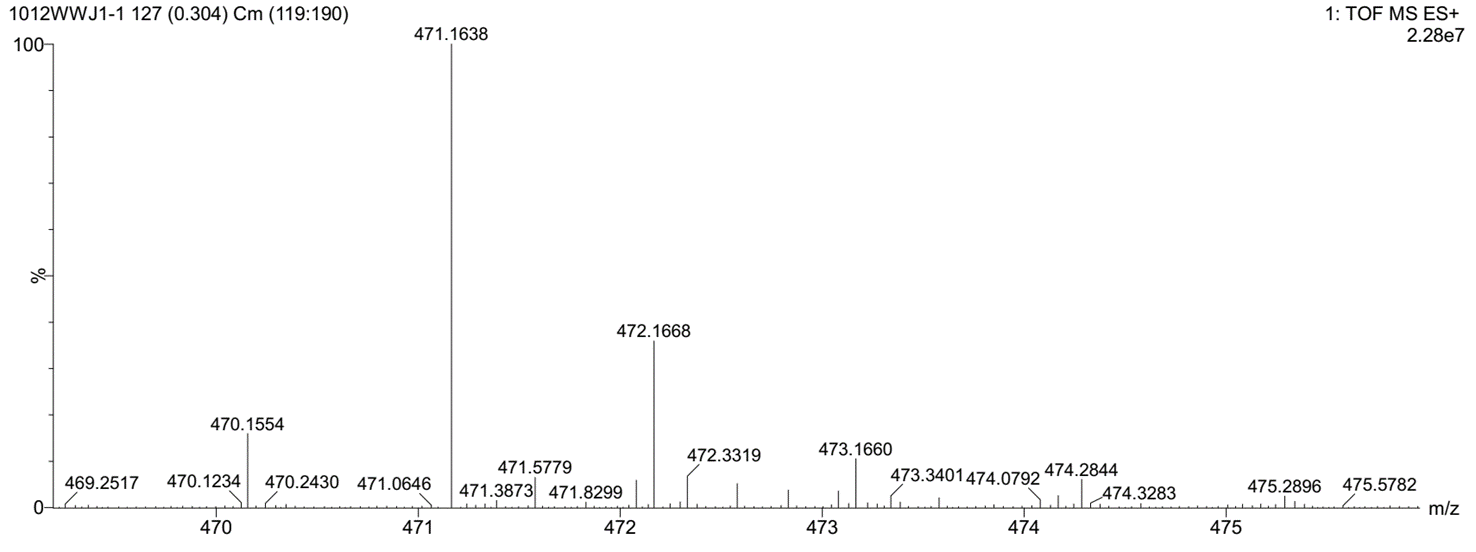
**

Fig. S1**.** HRMS of TB*m*A.

Fig. S2**.** 1H NMR spectrum of TB*m*A.

Fig. S3**.** 13C NMR spectrum of TB*m*A.

**
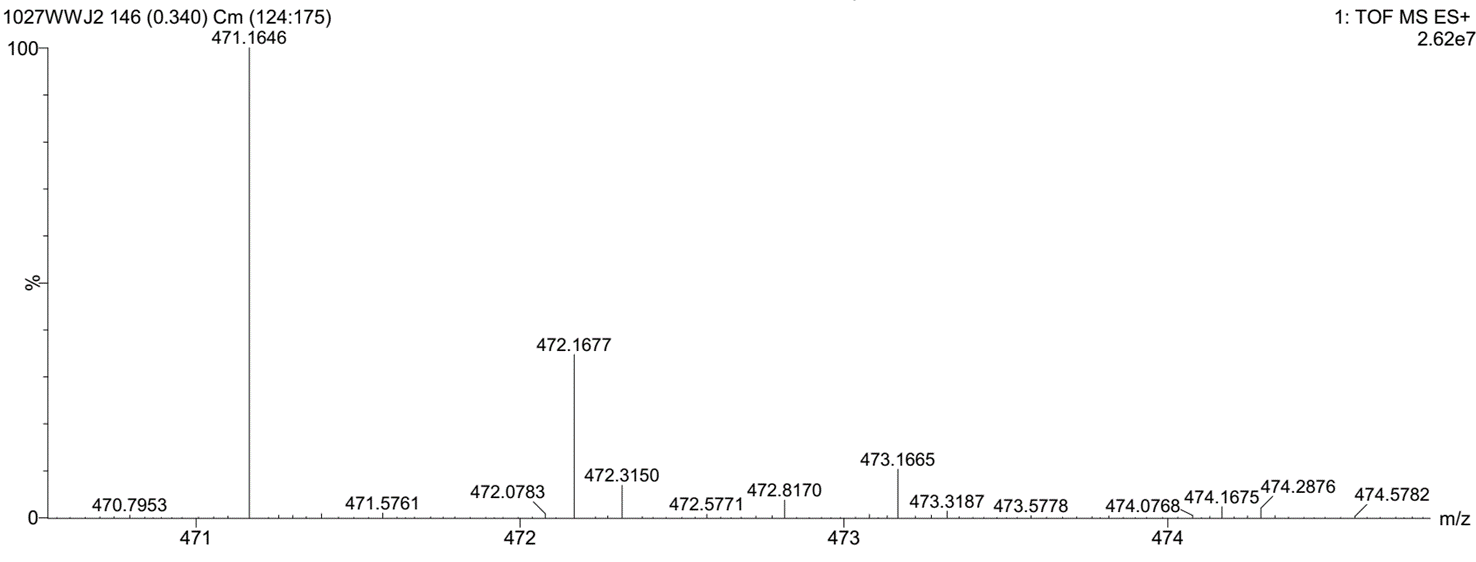
**

Fig. S4**.** HRMS spectrum of TB*p*A.

Fig. S5**.** 1H NMRspectrum of TB*p*A.

Fig. S6**.** 13C NMR spectrum of TB*p*A.

**
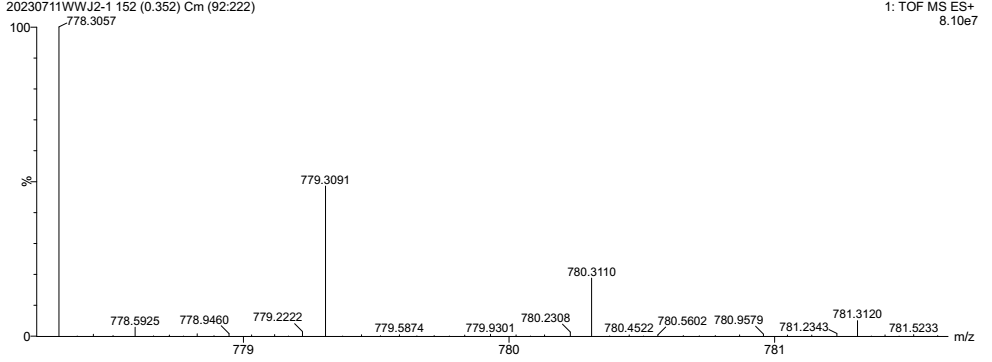
**

Fig. S7**.** HRMS spectrum of **5a**.

Fig. S8**.** 1H NMR spectrum of **5a**.

Fig. S9**.** 13C NMR spectrum of **5a**.

**
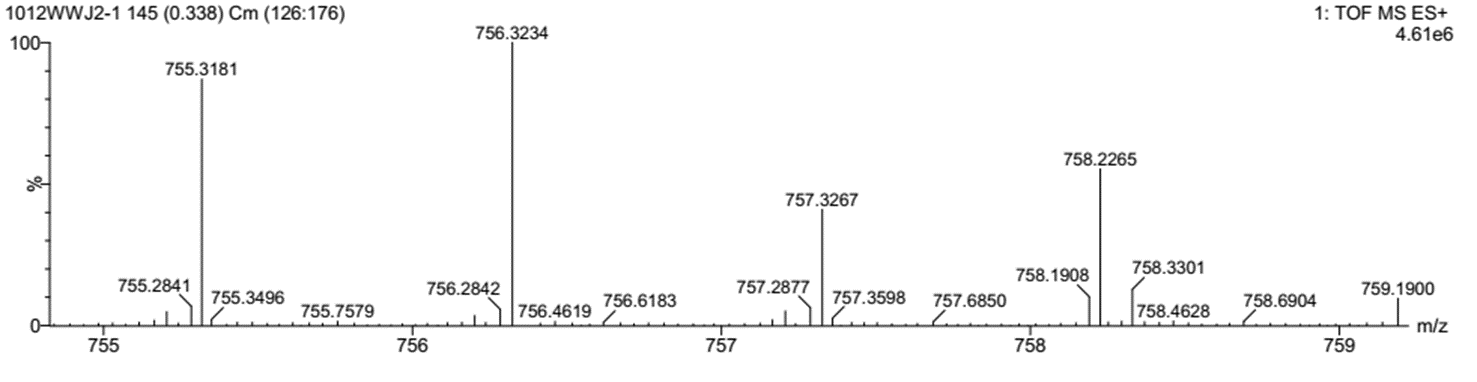
**

Fig. S10**.** HRMS spectrum of **5b**.

Fig. S11**.** 1H NMR spectrum of **5b**.

Fig. S12**.** 13C NMR spectrum of **5b**.


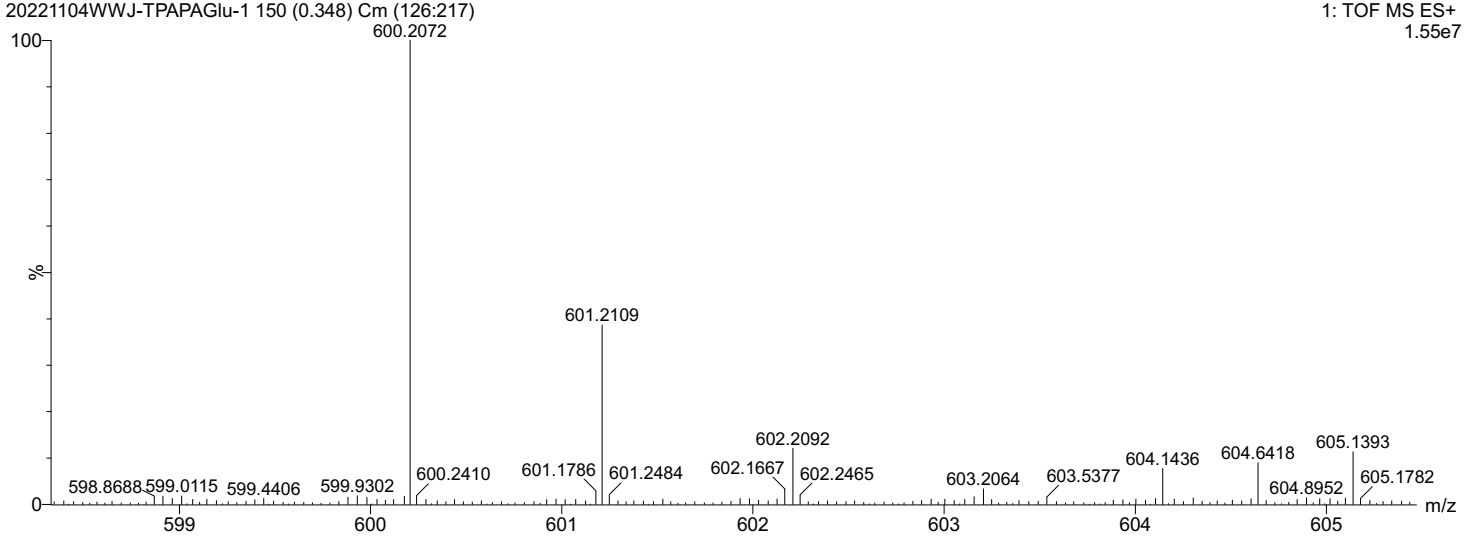


Fig. S13**.** HRMS spectrum of TB*m*A-Glu.

Fig. S14**.** 1H NMR spectrum of TB*m*A-Glu.

Fig. S15**.** 13C NMR spectrum of TB*m*A-Glu.

**
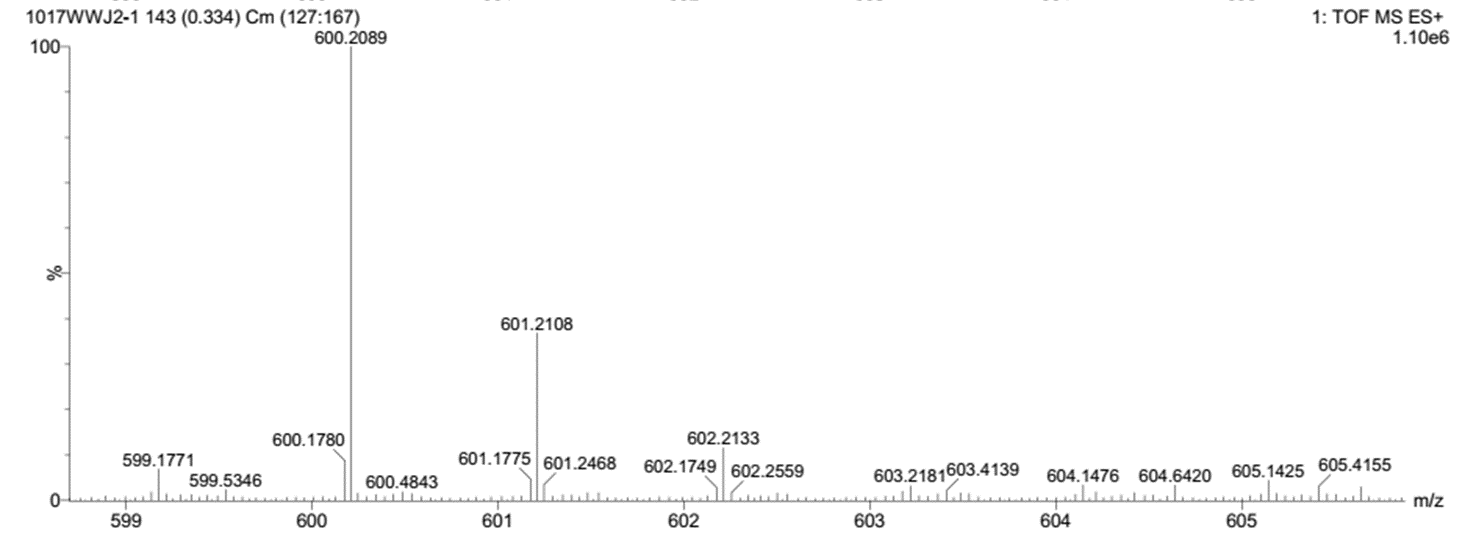
**

Fig. S16**.** HRMS spectrum of TB*p*A-Glu.

Fig. S17**.** 1H NMR spectrum of TB*p*A-Glu.

Fig. S18**.** 13C NMR spectrum of TB*p*A-Glu.

**
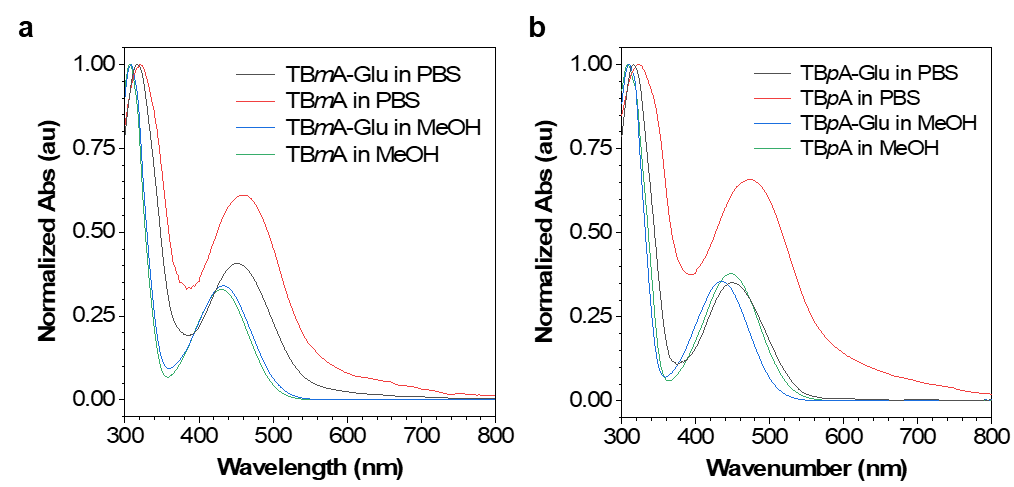
**

Fig. S19**.** Normalized absorption spectra of (a) TB*m*A-Glu/TB*m*A and (b) TB*p*A-Glu/TB*p*A in MeOH and PBS buffer solutions (*c* = 10 μM).

**
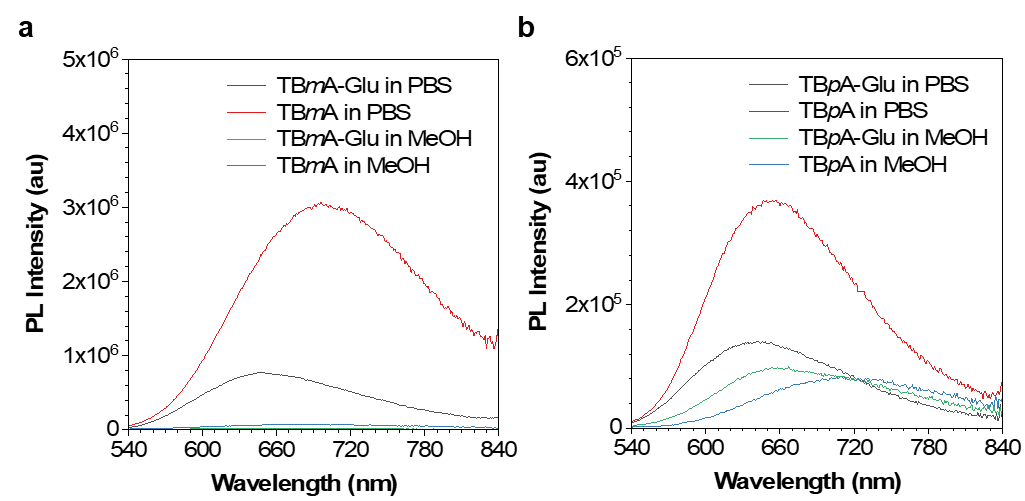
**

Fig. S20**.** Emission spectra of(a) TB*m*A-Glu/TB*m*A and (b) TB*p*A-Glu/TB*p*A in MeOH and PBS buffer solutions (*c* = 10 μM), λex = 455 nm.

**
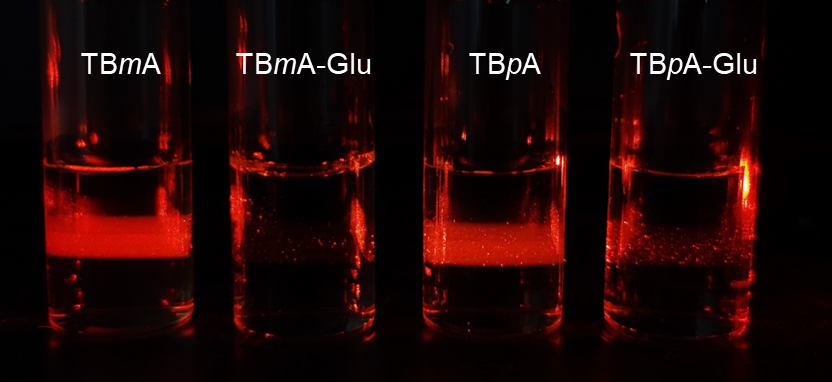
**

Fig. S21**.** The Tyndall effect of the TB*m*A and TBpA-Glu solution was irradiated by a red laser.

**
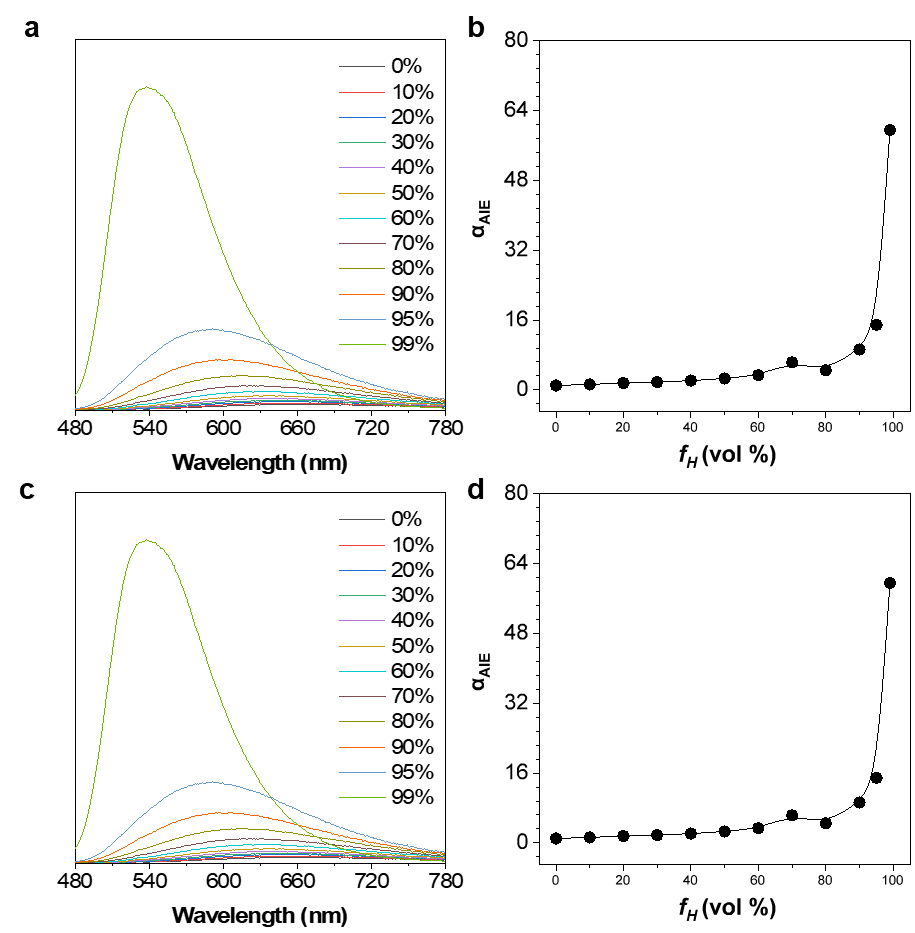
**

Fig. S22.PL spectra of TB*m*A-Glu (a, 10 μM) and TB*p*A-Glu (c, 10 μM) in MeOH/n-Hexane mixtures with different n-hexane fractions. The plot of *I*/*I*0 of TB*m*A-Glu (b) and TB*p*A-Glu (d) versus *fH*, where *I*0 = PL intensity in pure MeOH. λex = 455 nm

**
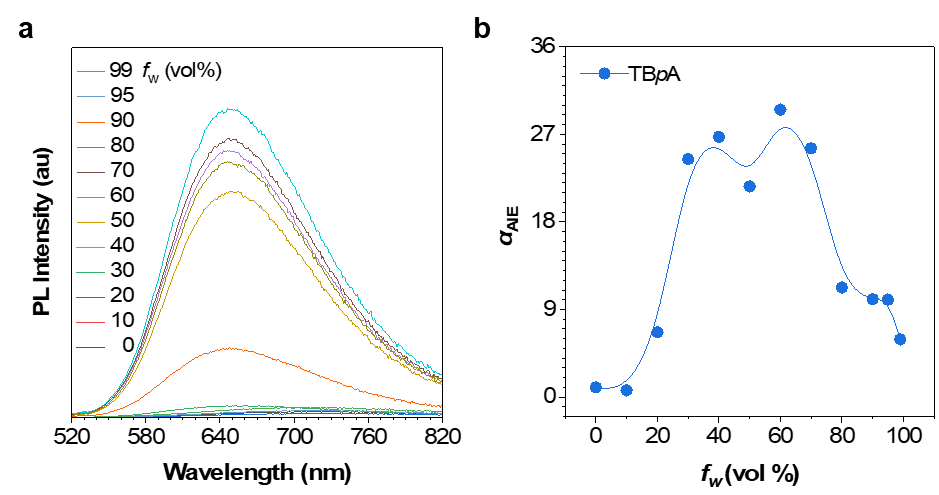
**

Fig. S23**.** (a) PL spectra of 10 μM TB*p*A in DMF/water mixtures with different water fractions (*fw*). λex = 455 nm; (b) Plot of *α*AIE (*I*/*I*0, where *I*0 = PL intensity in pure DMF) of TB*p*A versus *fw.*

**
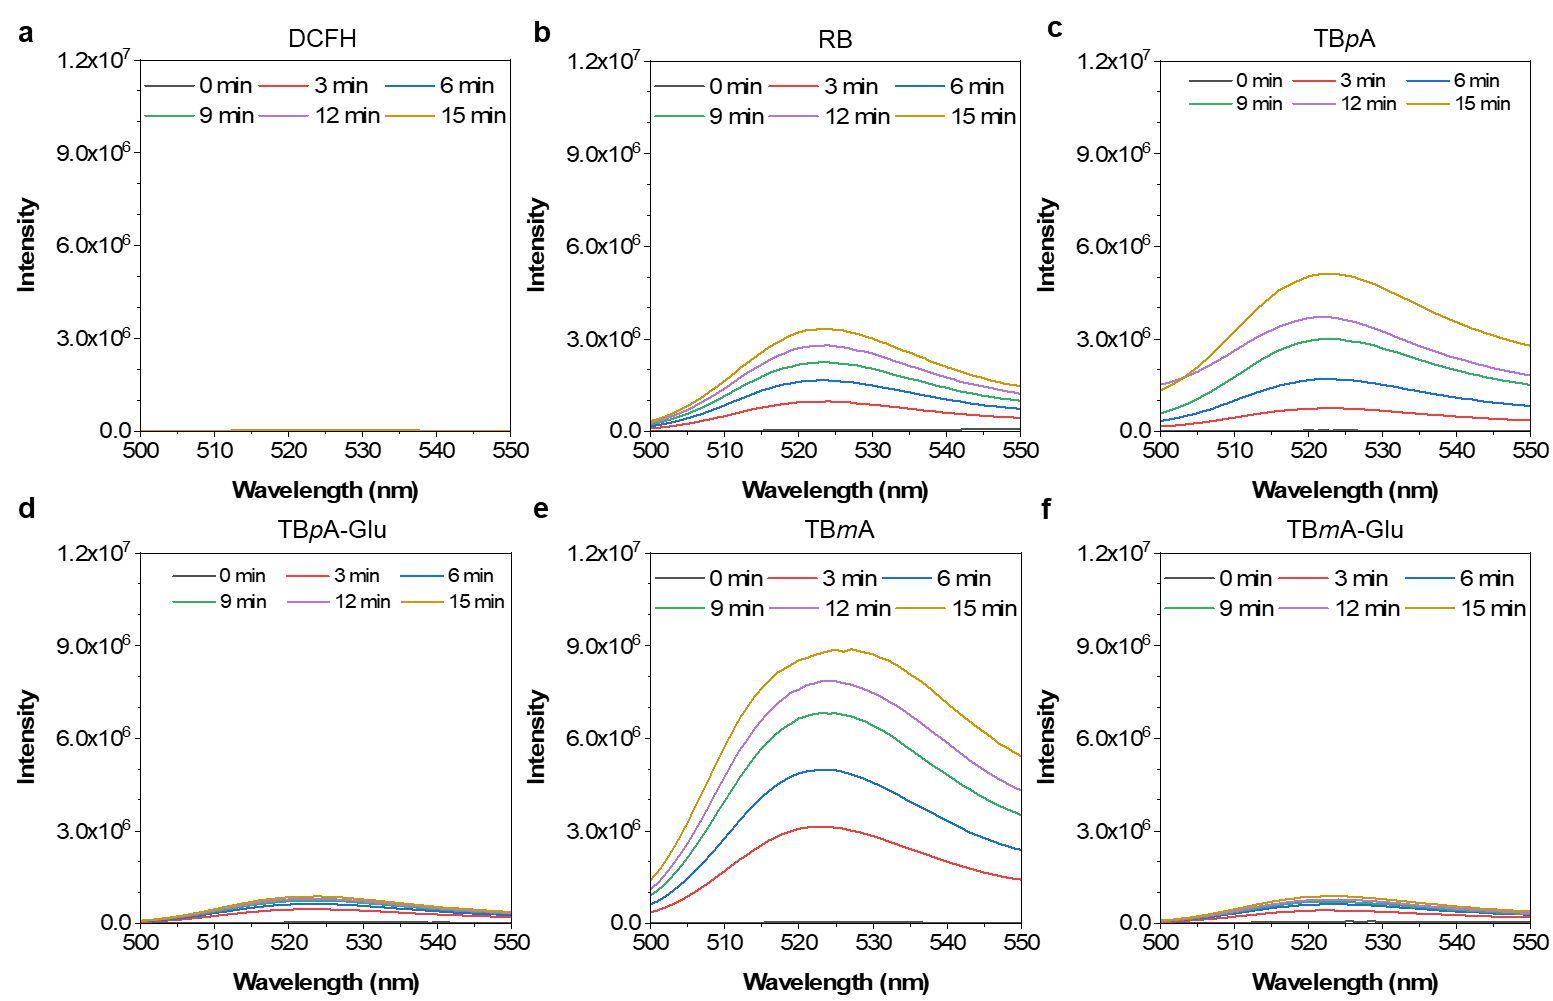
**

Fig. S24**.** Fluorescence emission changes of DCFH (10 μM) in the presence of 5 μM photosensitizers in DMSO-PBS (*v*:*v* = 1:99) after irradiation (20 MW cm-2) for a different time. (a) DCFH, (b) RB, (c) TB*p*A, (d) TB*p*A-Glu, (e) TB*m*A, (f) TB*m*A-Glu. DCHF, λex = 488 nm.

**
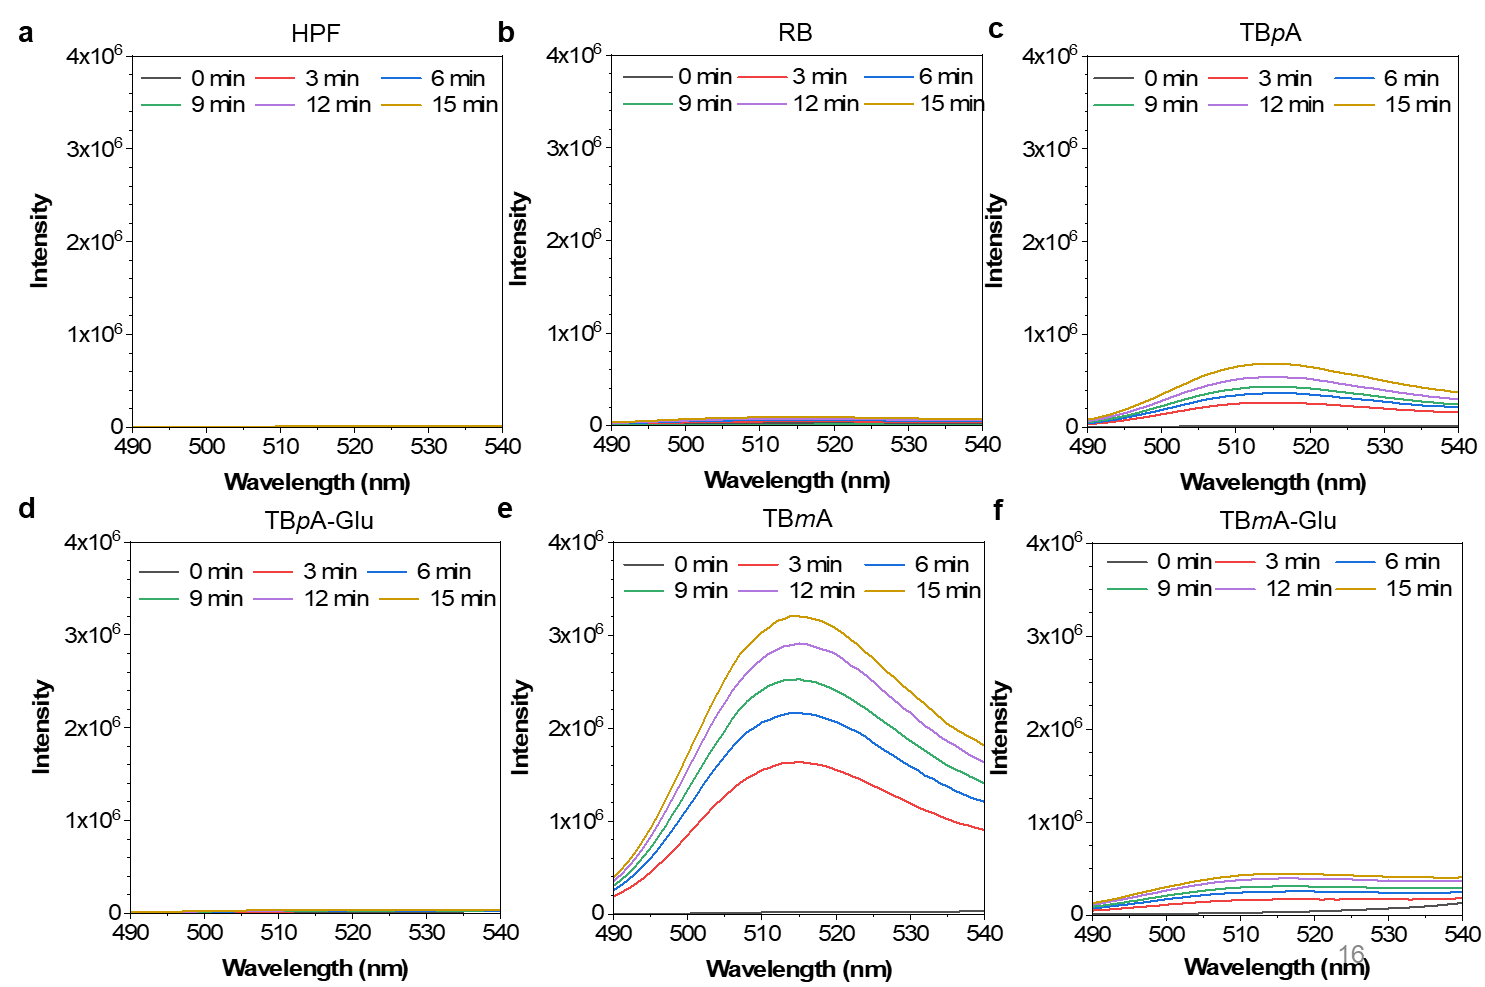
**

Fig. S25**.** Fluorescence emission changes of HPF (10 μM) in the presence of 5 μM photosensitizers in DMSO-PBS (*v*:*v* = 1/99) after irradiation (20 Mw cm-2) for different times. (a) Control, (b) RB, (c) TB*p*A, (d) TB*p*A-Glu, (e) TB*m*A, (f) TB*m*A-Glu. HPF, λex = 488 nm.

**
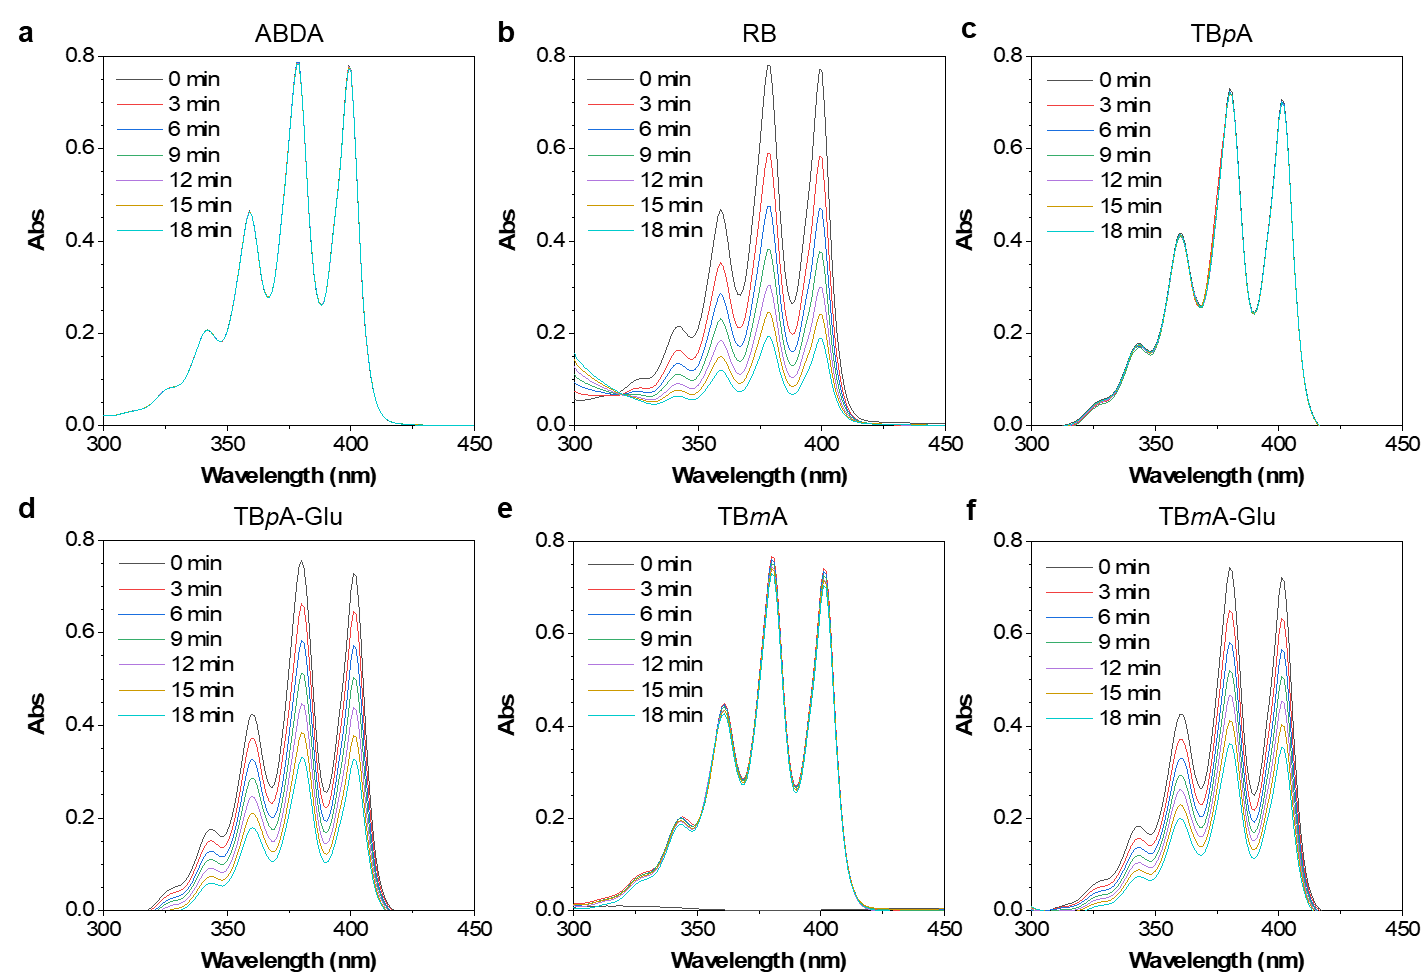
**

Fig. S26**.** UV-vis spectra of (a) ABDA in the presence of (b) RB, (c) TB*p*A, (d) TB*p*A-Glu, (e) TB*m*A, (f) TB*m*A-Glu in DMSO/PBS (*v*:*v* = 1:99) mixture under the irradiation with different time. *Concentration*: 100 μM for ABDA, 5 μM for AIE photosensitizers, white light irradiation (20 mW cm-2).

**
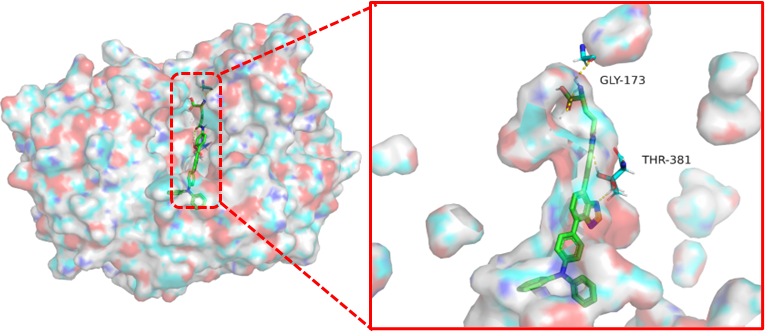
**

Fig. S27**.** The molecular docking results of TB*p*A-Glu with GGT (PDB: 4GG2). The TB*p*A-Glu are colored green, and the molecular surface of GGT is shown as a colorful surface with transparency. The enlarged images show the hydrogen bonds formed between TB*p*A-Glu and -Glutamyltransferase (GGT).

**
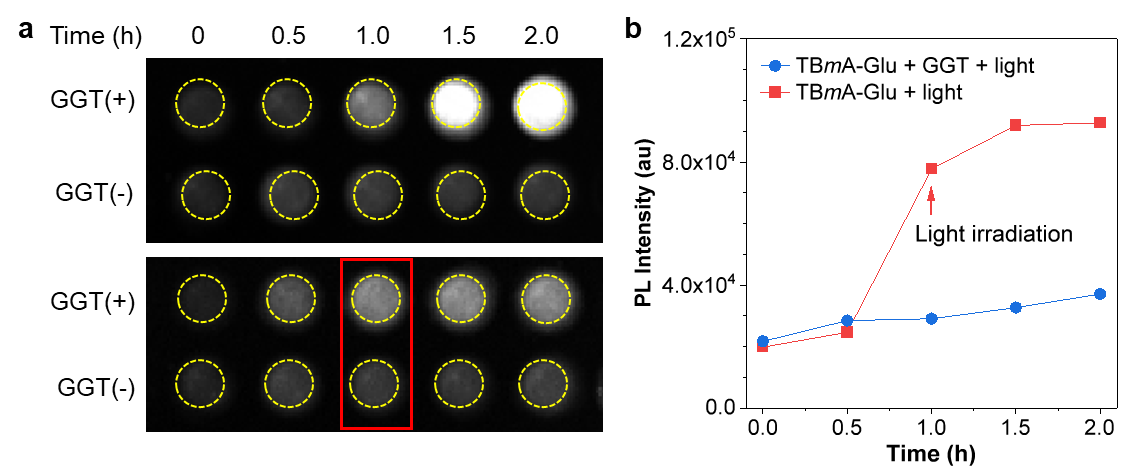
**

Fig. S28**.** (a) The fluorescence images of TB*m*A-Glu in the absence or the presence of GGT. The red arrow indicates the time point for light irradiation (12 J·cm2). (b) Fluorescence intensity changes of TB*m*A-Glu incubated in the HEPES buffer at 37 ℃ in the presence and absence of GGT with a white light LED array irradiation (12 J·cm−2). The red arrows indicate the time points for light irradiation. To a 5 μM solution of TB*m*A-Glu in 10 mM HEPES buffer, pH 7.4, containing 0.1% DMSO as a cosolvent, 5 units of GGT was added. The reaction mixture was incubated at 37 ℃ for 1 h before the light irradiation.


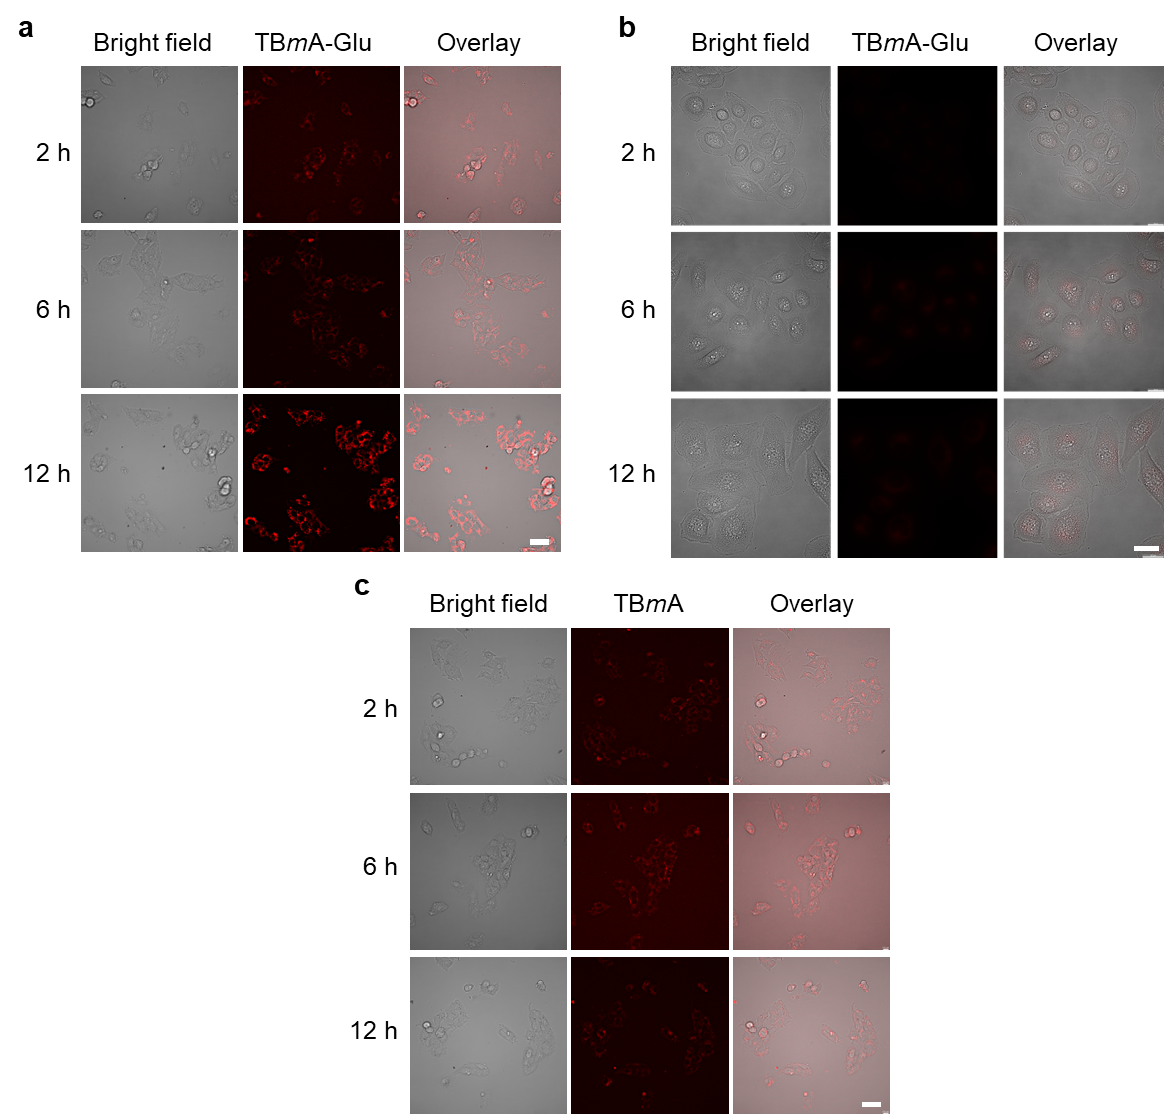


Fig. S29**.** The time-dependent uptake process of TB*m*A-Glu (a) / TB*m*A (b) in HepG2 cells. (c) The time-dependent uptake process of TB*m*A-Glu in LO2 cells. All the cells were incubated with 5 μM TB*m*A-Glu / TB*m*A and imaged at the indicated time. λex = 465 nm; λem = 700 ± 20 nm, Scale bar, 20 μm.

**
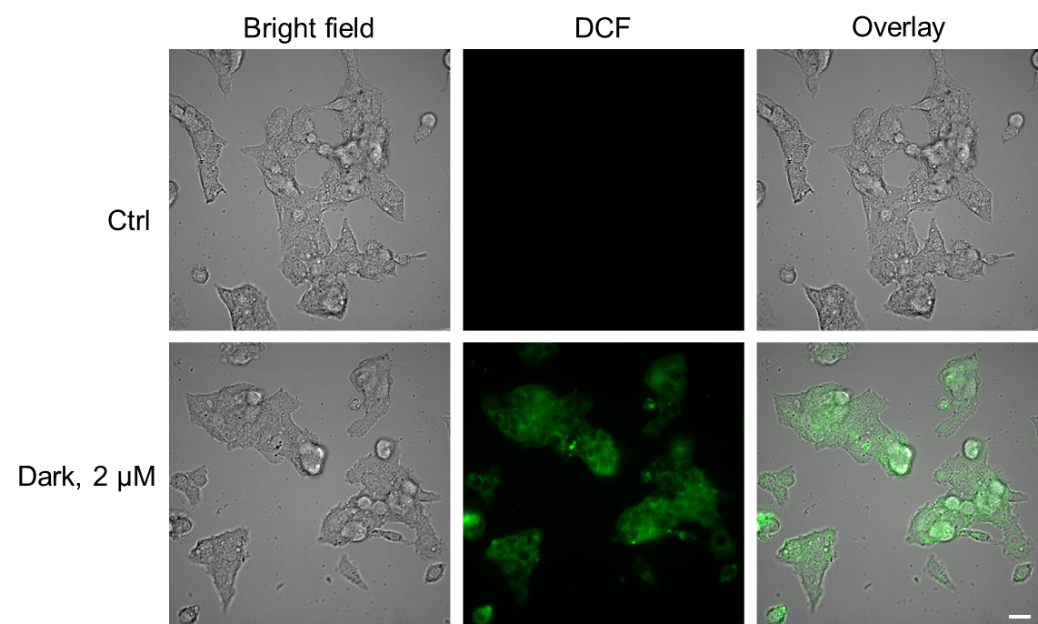
**

Fig. S30**.** Intracellular ROS generation in HepG2 cells. HepG2 cells were incubated with TB*m*A-Glu (2 μM) or 1% DMSO (Ctrl) for 24 h. DCFH-DA (10 μM) was used as the ROS indicator. DCFH-DA, *λ*ex = 488 nm, *λ*em = 500 ± 20 nm; TB*m*A-Glu, *λ*ex = 465 nm, *λ*em = 700 ± 20 nm. Scale bar = 20 μm.


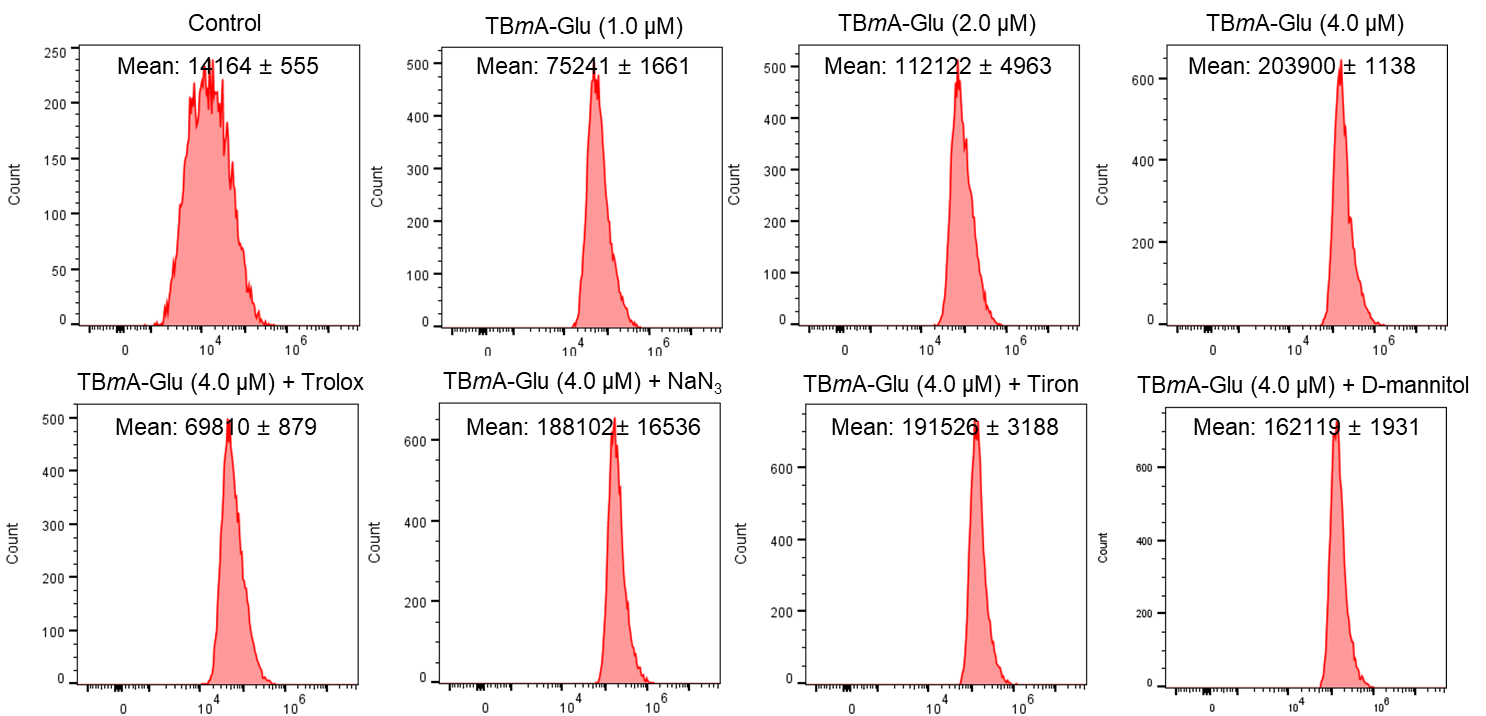


Fig. S31**.** Intracellular ROS levels measured by DCF staining with flow cytometry (*λ*ex = 488 nm, *λ*em = 525 ± 20 nm). HephG2 cells were treated with the TBmA-Glu as the indicated concentrations for 12 h and irradiated with a white laser array (12 J ⋅ cm−2) before incubated with DCFH-DA (10 μM, 15 min). For the scavenger assay, cells were pre-incubated with the ROS scavengers for 2 h (Tiron: 10 mM; NaN3: 5 mM; mannitol: 50 mM; Ebselen: 50 μM), and then the cells were treated with TBmA-Glu (4 μM) for 12 h and irradiated with a white laser array (12 J ⋅ cm−2) before incubated with DCFH-DA (10 μM, 15 min).

**
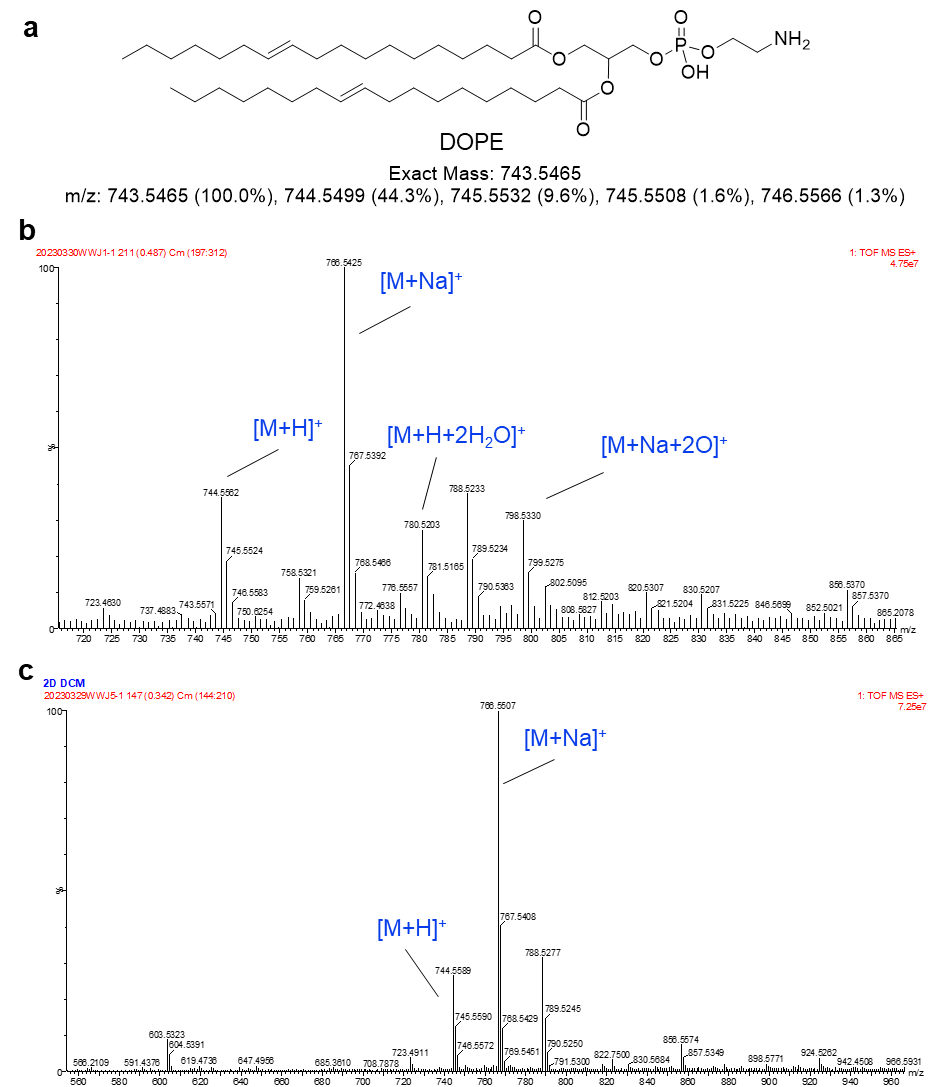
**

Fig. S32**.** (a) The structure of 1,2-Dioleoyl-sn-glycero-3-phosphoethanolamine (DOPE). The results of HR-MS of DOPE (10 μM) coincubate with TB*m*A (10 μM) with (b) /without (c) light irradiation.

**
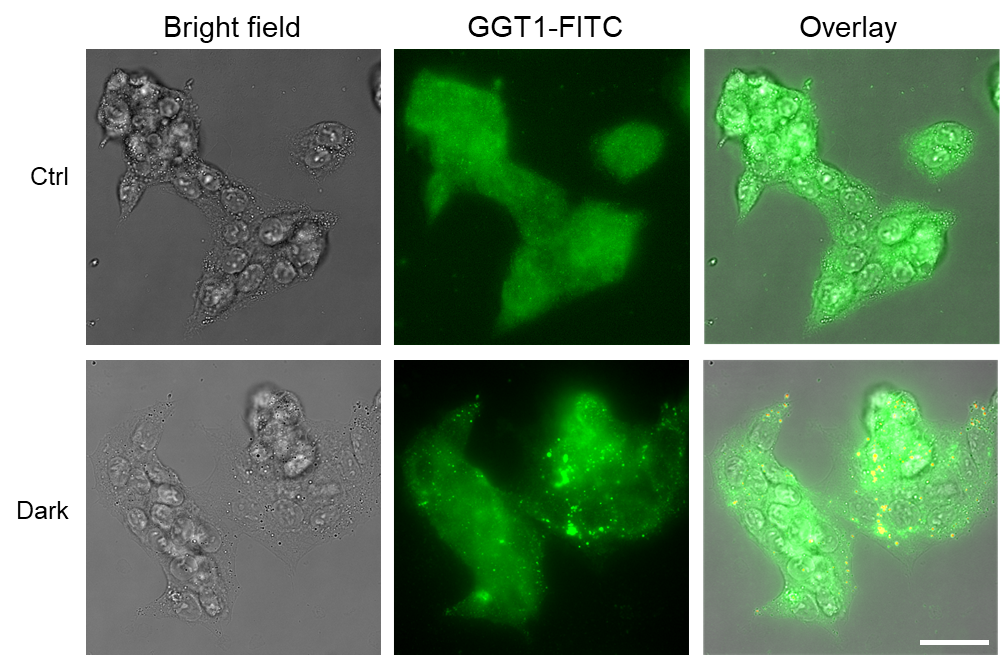
**

Fig. S33**.** The intracellular level changes of GGT in HepG2 cells after being treated with TB*m*A-Glu (2 μM) for 24 h. Scale bar, 20 μm.

**
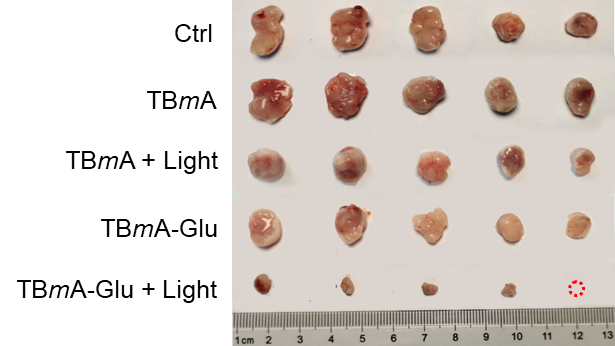
**

Fig. S34**.** The photographs of the separated tumors in different treatment groups at the end of the treatment process.

**
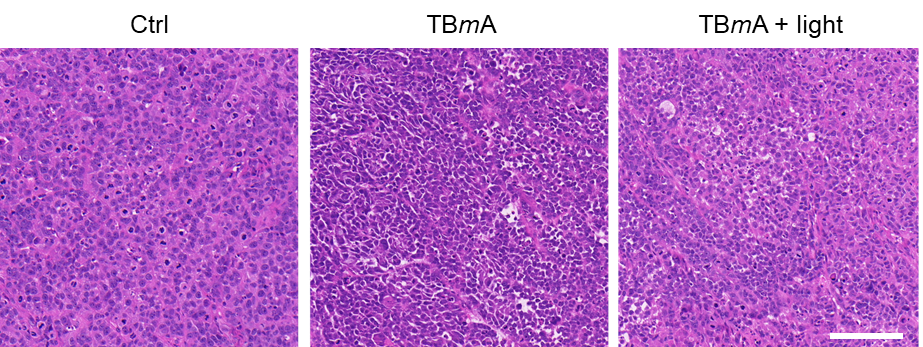
**

Fig. S35**.** Hematoxylin-eosin staining in tumor sections from mice with different treatments. The mice were treated with TB*m*A (5 mg/kg) or physiological saline (Control): scale bar, 100 μm.

Fig. S36**.** The relative integral optical density (IOD) of GPX4 in immunohistochemistry images of TBmA-Glu/TBmA (5 mg/kg) PDT groups. Data expressed as average ± standard error, n = 3. Statistical significance: P values, ***P < 0.001, calculated with the Student’s T-test.

Fig. S37**.** The average weight of mice after treatment with TBmA-Glu/TBmA (5 mg/kg) or physiological saline (Control). Data expressed as average ± standard error, n = 5. Statistical significance: P values, ***P < 0.001, calculated with the Student’s T-test.


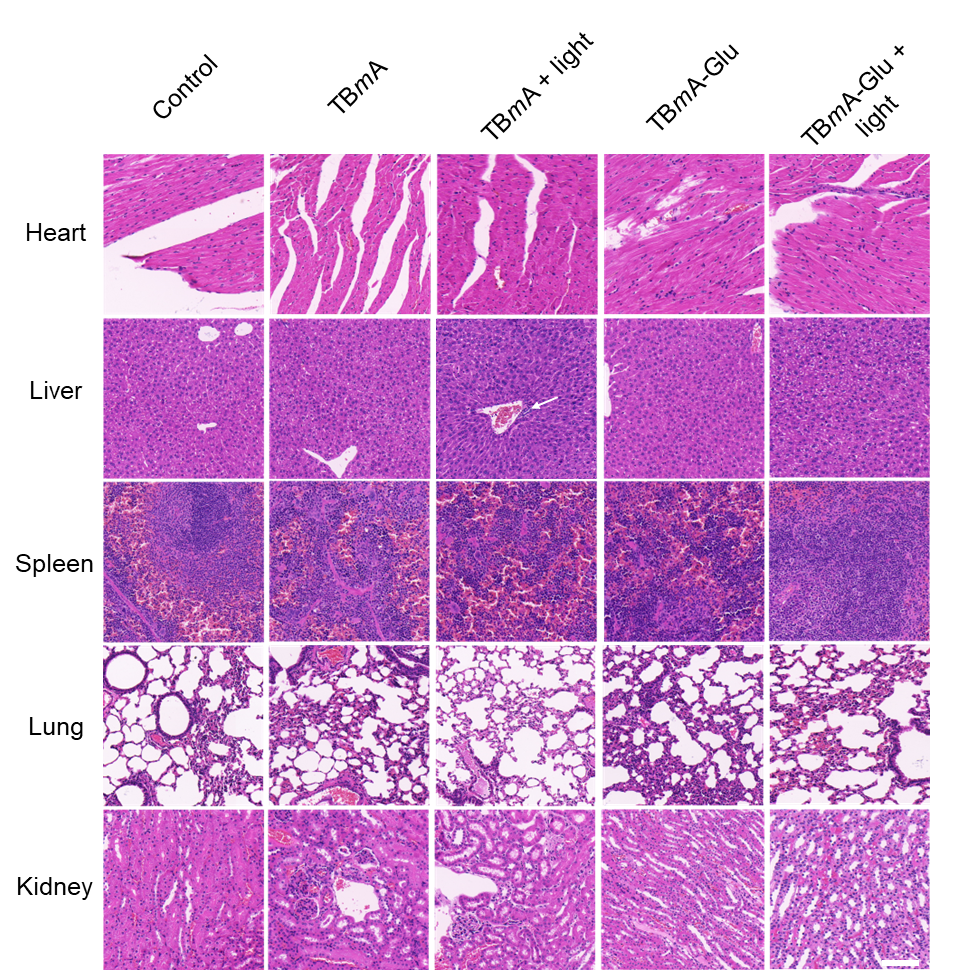


Fig. S38**.** The representative hematoxylin-eosin staining images of organs from mice after treatment with TB*m*A-Glu/TB*m*A (5 mg/kg) or physiological saline (Control). Scale bar, 100 μm

**
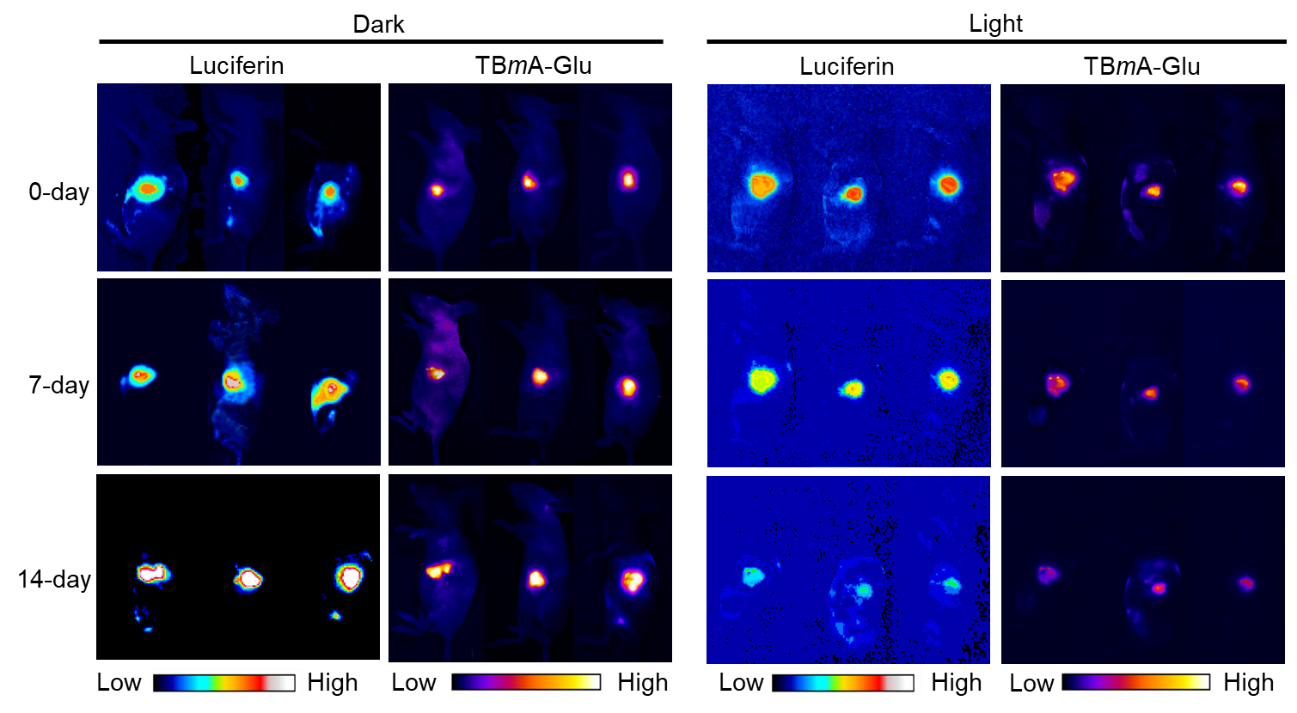
**

Fig. S39**.** The fluorescence images of the in-situ hepatoma mice at the start, middle, and end of the treatment process by TB*m*A-Glu (5 mg/kg). Luminescence, λem = 550 ± 50 nm (BP), 1000 ms. TB*m*A-Glu, λex = 500 nm, λem = 700 nm (Long pass filter).

**
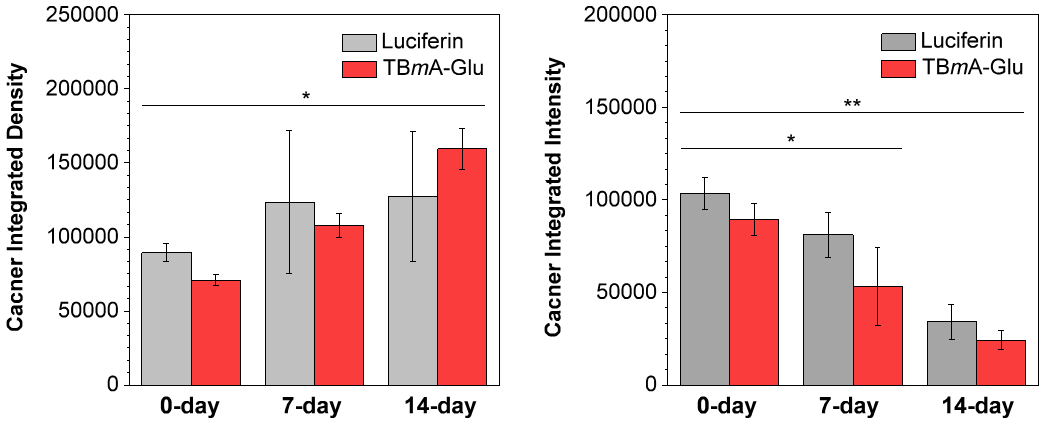
**

Fig. S40**.** The relative integral optical density (IOD) of cancer in the mice of in-situ hepatoma models after treated TB*m*A-Glu (5 mg/kg) with or without light irradiation. Data expressed as average ± standard error, n = 3. Statistical significance: P values, *P < 0.05, **P < 0.01, calculated with the Student’s T-test.

**
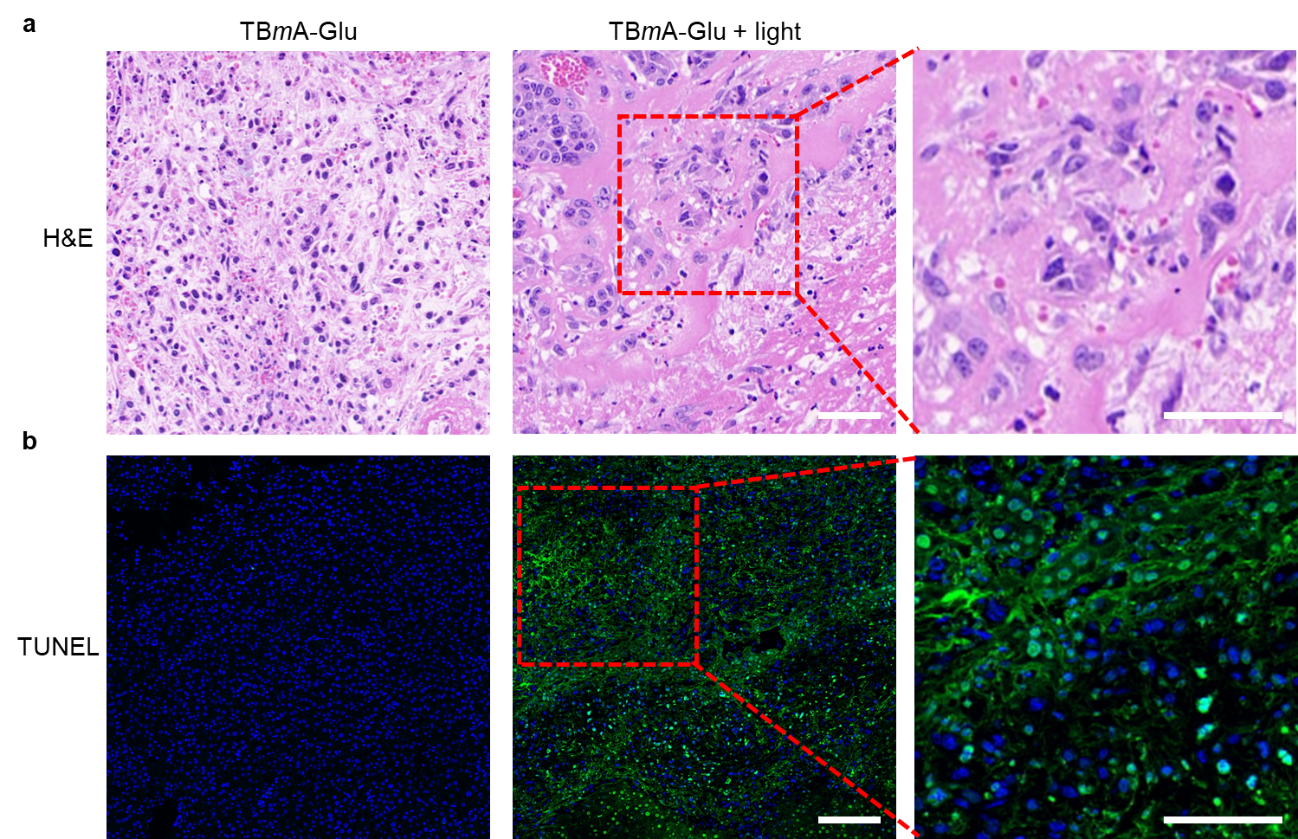
**

Fig. S41**.** (a) The representative hematoxylin-eosin staining images of livers of the mice in an in situ hepatoma model after treatment with TB*m*A-Glu (5 mg/kg). The enlarged area shows fibrosis of tumor tissue after photodynamic therapy by TB*m*A-Glu. (b) TUNEL assay of livers of the mice in an in situ hepatoma model after treatment with TB*m*A-Glu (5 mg/kg). Scale bar, 100 μm and 50 μm (for the enlarged images).

**
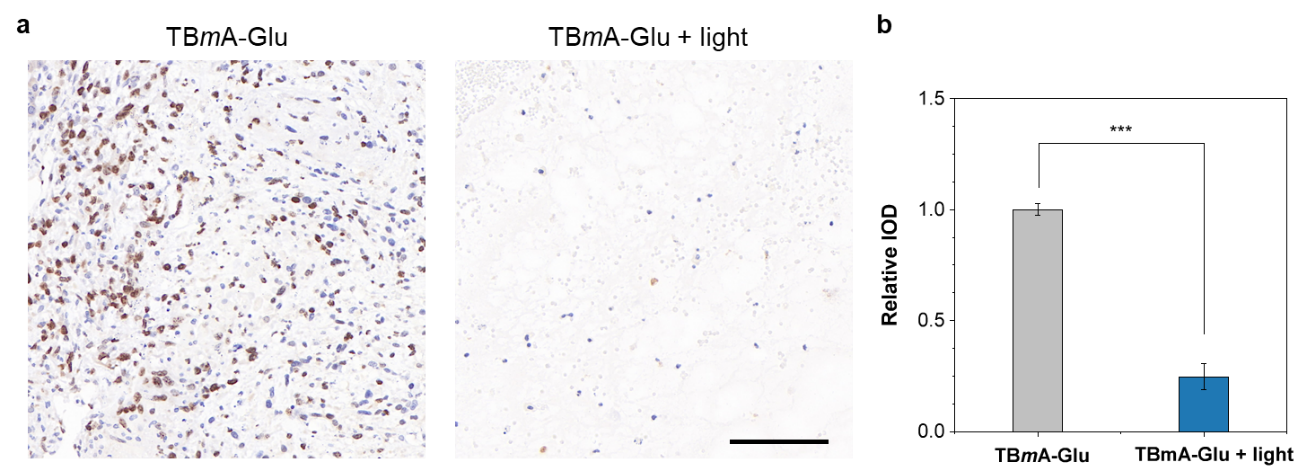
**

Fig. S42**.** Ki67 staining of tumor tissue from livers of the mice in an in situ hepatoma model after being treated by TB*m*A-Glu (5 mg/kg). Scale =100 mm Scale bar, 100 μm.

Table S1**.** The results of docking with GGT

| **Compounds** | **Ki (μM)** | **Intermolecular energy (Kcal/mol)** | **Binding energy (Kcal/mol)** | **Interacting amino acid residues** |
| --- | --- | --- | --- | --- |
| Glutamate | 14.68 | -8.37 | -6.29 | THR381, ASN401, ASP423, SER451, SER452 GLY473, GLY474 |
| TB*m*A-Glu | 0.17 | -12.85 | -9.27 | AGR327, ASP422, PHE424,  ASN431 |
| TB*p*A-Glu | 2.86 | -11.14 | -7.56 | GLY173, THR381 |

Table S2. The photocytotoxicity (IC50, μM) of GGT activable AIE photosensitizer in different conditions.

|  | Compound | HepG2 (GGT highly expressed) | | | HeLa (GGT moderately expressed) | | | LO2 (GGT low expressed) | | |
| --- | --- | --- | --- | --- | --- | --- | --- | --- | --- | --- |
| Dark[a] | Light[b] | PI[c] | Dark | Light | PI | Dark | Light | PI |
| Normoxia (20% O2) | TB*p*A | 28.35 ± 5.21 | 20.54 ± 1.14 | 1.38 | 28.47 ± 3.35 | 25.91 ± 3.42 | 1.86 | 24.14± 4.22 | 25.36 ± 1.87 | 1.19 |
| TB*p*A-Glu | 23.51 ± 2.31 | 6.70 ± 0.21 | 3.51 | 20.31 ± 2.24 | 15.24 ± 1.10 | 1.98 | 53.45 ± 3.51 | 30.14 ± 1.28 | 1.77 |
| TB*m*A | 25.22 ± 2.40 | 12.54 ± 2.24 | 2.01 | 21.46 ± 4.85 | 26.36 ± 2.25 | 1.19 | 25.49 ± 3.47 | 28.58 ± 2.27 | 1.14 |
| TB*m*A-Glu | 20.12 ± 3.74 | 2.15 ± 0.23 | 9.36 | 33.22 ± 2.66 | 10.53 ± 3.67 | 3.15 | 47.17 ± 5.81 | 40.45 ± 1.54 | 1.17 |
| Hypoxia  (2% O2) | TB*p*A-Glu | 25.44 ± 4.31 | 7.68 ± 1.65 | 3.31 | 37.75 ± 5.17 | 21.28 ± 3.45 | 1.77 | 55.47 ± 2.74 | 41.12 ± 2.14 | 1.13 |
| TB*p*A | 29.35 ± 5.21 | 24.74 ± 2.11 | 1.19 | 28.47 ± 1.01 | 22.57 ± 2.14 | 1.26 | 27.74 ± 1.55 | 26.28 ± 1.41 | 1.05 |
| TB*m*A-Glu | 28.85 ± 3.77 | 3.15 ± 0.74 | 9.15 | 38.89 ± 2.19 | 12.57 ± 3.39 | 3.09 | 46.67± 1.33 | 33.11± 1.42 | 1.11 |
|  | TB*m*A | 26.47 ± 1.15 | 13.47 ± 1.15 | 1.96 | 25.37 ± 1.46 | 15.74 ± 2.10 | 1.61 | 28.39 ± 2.33 | 24.47 ± 1.12 | 1.16 |

[a] Cells were incubated with the tested compounds for 24 h and detected by MTT assay; [b] Cells were incubated with the compounds in the dark for 24 h. The light treatment groups were irradiated with a white led array (12 J·cm−2) after incubation for 12 h, then incubated for another 12 h. [c] Phototoxicity index (PI) is defined as the ratio of darkIC50 / lightIC50.

# References

1. Liu S, Zhang H, Li Y, Liu J, Du L, Chen M*, et al.* Strategies to enhance the photosensitization: polymerization and the donor-acceptor even-odd effect. *Angew. Chem. Int. Ed.* **57**, 15189-15193 (2018).
